# Supplementary material
Source: publisher figshare collection journal article supplement (https://gsapubs.figshare.com/ndownloader/files/22759253)
Supplement: Supplementary file 1 [file 22759253]

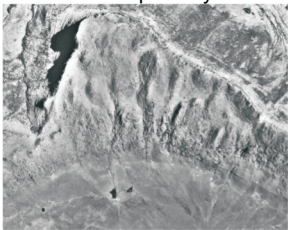

uninterpreted aerial photo (Figure 2 within paper)

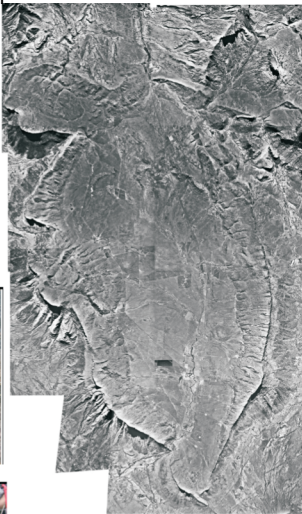

Uninterpreted aerial photo of GVS (Figure 1 within paper)

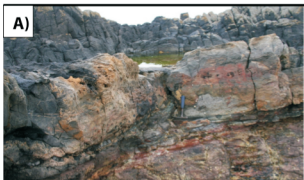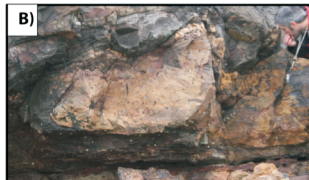

Field photographs accompanying field sketches of Figure 6 within paper
